# Supplementary material
Source: MDPI journal article supplement (https://www.mdpi.com/2073-4441/15/4/767)
Supplement: s1 [file s1]

## Supplementary Materials

### Adsorption of Pb, Cu and Cd from Water on Coal Fly Ash-Red Mud Modified Composite Material: Characterization and Mechanism

Yuyan Zhao <sup>1,2</sup>, Hanwen Luan <sup>1</sup>, Binghan Yang <sup>1</sup>, Zhenghe Li <sup>1</sup>, Meitong Song <sup>1</sup>, Bing Li <sup>1,2</sup>, Xiaodan Tang <sup>1,2,\*</sup>

1 College of Geo-exploration Science and Technology, Jilin University, Changchun 130026, China

2 Institute for black soils, Jilin University, Changchun 130026, China

\* Correspondence: tangxiaodan@jlu.edu.cn (X.T.)

#### Figure caption list

**Figure S1.** Scheme of coal fly ash (CFA)-red mud (RM) modified composite material preparation, performance characterization, and adsorption analysis.

**Figure S2.** Pore size distribution of CFA, RM, C4R1, C1R1, and C1R4.

#### Table title list

**Table S1.** Percentage of each element for CFA, RM, C4R1, C1R1, and C1R4 in EDS analysis.

**Table S2.** Physical properties of CFA, RM, C4R1, C1R1, and C1R4.

**Table S3.** Adsorption isothermal parameters of Pb, Cu, and Cd by C4R1, C1R1, and C1R4.

**Table S4.** Kinetic fitting parameters of C4R1, C1R1, and C1R4 in the single system.

**Table S5.** Kinetic fitting parameters of C4R1, C1R1, and C1R4 in the ternary system.

**Figure S1.** Scheme of coal fly ash (CFA)-red mud (RM) modified composite material preparation, performance characterization, and adsorption analysis.

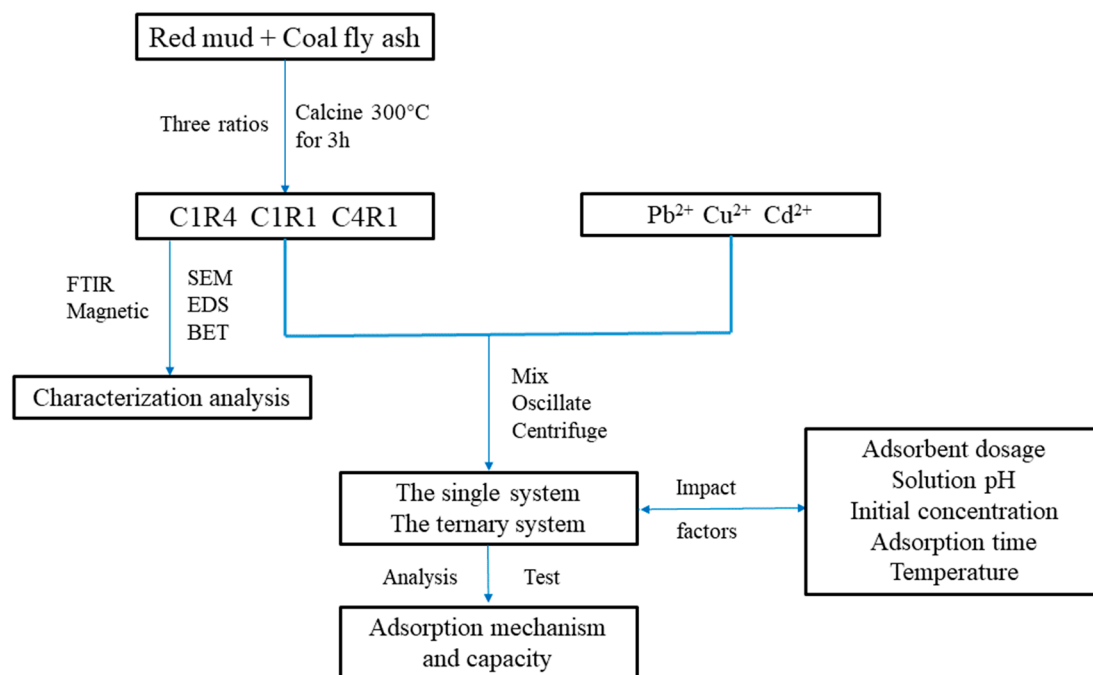

**Figure S2.** Pore size distribution of CFA, RM, C4R1, C1R1, and C1R4.

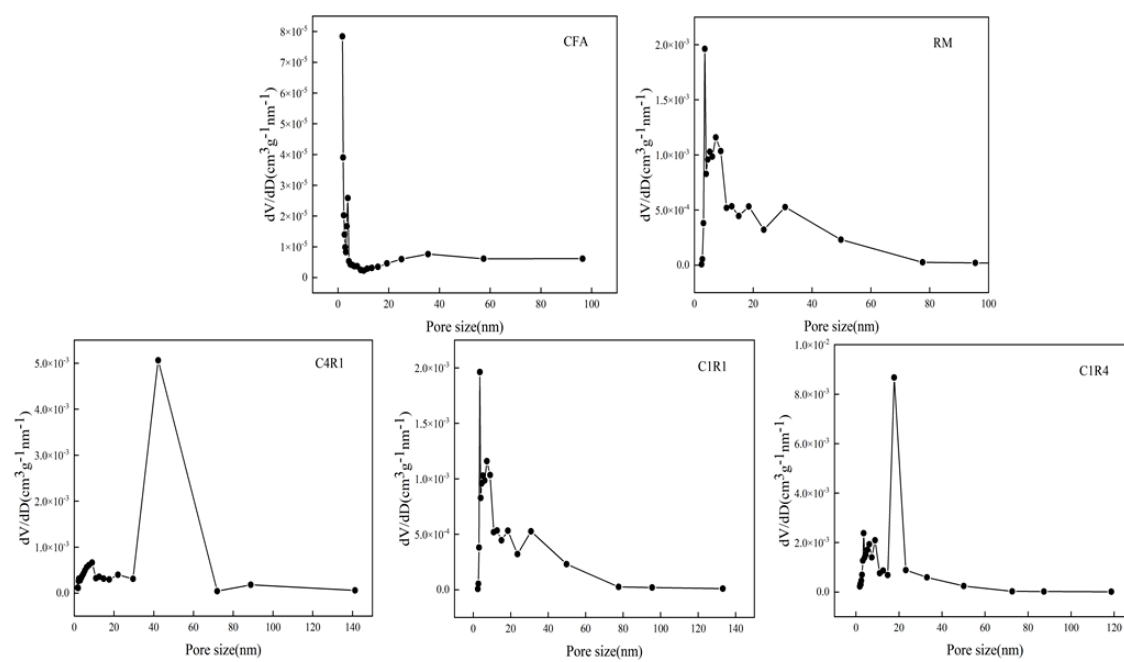

**Table S1.** Percentage of each element for CFA, RM, C4R1, C1R1, and C1R4 in EDS analysis.

| <b>Material</b> | <b>Element</b> | <b>Wt%</b> | <b>Wt% Sigma</b> | <b>Atomic percentage</b> |
|-----------------|----------------|------------|------------------|--------------------------|
| CFA             | C              | 5.39       | 0.50             | 9.00                     |
|                 | O              | 46.40      | 0.33             | 58.10                    |
|                 | Na             | 1.45       | 0.06             | 1.27                     |
|                 | Mg             | 0.57       | 0.04             | 0.47                     |
|                 | Al             | 17.27      | 0.15             | 12.82                    |
|                 | Si             | 22.77      | 0.18             | 16.24                    |
|                 | K              | 1.09       | 0.05             | 0.56                     |
|                 | Ca             | 0.48       | 0.04             | 0.24                     |
|                 | Ti             | 0.27       | 0.05             | 0.11                     |
|                 | Fe             | 1.04       | 0.09             | 0.37                     |
|                 | Cu             | 1.02       | 0.16             | 0.32                     |
|                 | Zr             | 3.55       | 0.14             | 0.82                     |
|                 | Total          | 100.00     |                  | 100.00                   |
| RM              | C              | 9.14       | 0.58             | 15.42                    |
|                 | O              | 48.17      | 0.40             | 60.99                    |
|                 | Na             | 5.04       | 0.14             | 4.44                     |
|                 | Al             | 9.88       | 0.13             | 7.41                     |
|                 | Si             | 3.45       | 0.07             | 2.48                     |
|                 | S              | 0.27       | 0.03             | 0.17                     |
|                 | K              | 0.16       | 0.03             | 0.08                     |
|                 | Ca             | 2.08       | 0.05             | 1.05                     |
|                 | Ti             | 1.85       | 0.06             | 0.78                     |
|                 | Fe             | 18.34      | 0.21             | 6.65                     |
|                 | Cu             | 0.97       | 0.09             | 0.31                     |
|                 | Zn             | 0.65       | 0.10             | 0.20                     |
|                 | Total          | 100.00     |                  | 100.00                   |
| C4R1            | C              | 25.44      | 3.57             | 37.08                    |
|                 | O              | 39.19      | 1.90             | 42.89                    |
|                 | Na             | 6.72       | 0.35             | 5.12                     |
|                 | Mg             | 0.23       | 0.05             | 0.16                     |
|                 | Al             | 8.52       | 0.42             | 5.53                     |
|                 | Si             | 11.06      | 0.54             | 6.89                     |
|                 | K              | 0.42       | 0.05             | 0.19                     |
|                 | Ca             | 1.46       | 0.09             | 0.64                     |
|                 | Ti             | 0.28       | 0.05             | 0.10                     |
|                 | Fe             | 1.93       | 0.13             | 0.60                     |
|                 | Cu             | 0.95       | 0.11             | 0.26                     |
|                 | Zn             | 0.83       | 0.13             | 0.22                     |
|                 | Pd             | 0.46       | 0.09             | 0.08                     |
|                 | Pt             | 2.52       | 0.22             | 0.23                     |
|                 | Total          | 100.00     |                  | 100.00                   |
| C1R1            | O              | 49.55      | 0.26             | 64.66                    |

|      |       |        |      |        |
|------|-------|--------|------|--------|
|      | Na    | 12.42  | 0.16 | 11.28  |
|      | Mg    | 1.01   | 0.06 | 0.86   |
|      | Al    | 12.30  | 0.12 | 9.52   |
|      | Si    | 13.39  | 0.12 | 9.96   |
|      | K     | 0.31   | 0.03 | 0.17   |
|      | Ca    | 0.80   | 0.04 | 0.41   |
|      | Ti    | 0.98   | 0.05 | 0.43   |
|      | Fe    | 5.20   | 0.10 | 1.94   |
|      | Cu    | 0.76   | 0.08 | 0.25   |
|      | Zn    | 0.60   | 0.09 | 0.19   |
|      | Pd    | 0.47   | 0.08 | 0.09   |
|      | Pt    | 2.22   | 0.17 | 0.24   |
|      | Total | 100.00 |      | 100.00 |
| C1R4 | C     | 12.99  | 2.69 | 21.15  |
|      | O     | 43.83  | 1.38 | 53.58  |
|      | Na    | 8.65   | 0.30 | 7.36   |
|      | Al    | 8.67   | 0.28 | 6.29   |
|      | Si    | 9.02   | 0.29 | 6.28   |
|      | K     | 0.14   | 0.03 | 0.07   |
|      | Ca    | 0.76   | 0.04 | 0.37   |
|      | Ti    | 0.85   | 0.05 | 0.35   |
|      | Fe    | 10.76  | 0.36 | 3.77   |
|      | Cu    | 0.83   | 0.08 | 0.25   |
|      | Zn    | 0.67   | 0.09 | 0.20   |
|      | Pd    | 0.52   | 0.07 | 0.10   |
|      | Pt    | 2.29   | 0.16 | 0.23   |
|      | Total | 100.00 |      | 100.00 |

**Table S2.** Physical properties of CFA, RM, C4R1, C1R1, and C1R4.

| <b>Property</b>                           | <b>CFA</b> | <b>RM</b> | <b>C4R1</b> | <b>C1R1</b> | <b>C1R4</b> |
|-------------------------------------------|------------|-----------|-------------|-------------|-------------|
| Specific surface area (m <sup>2</sup> /g) | 0.6828     | 33.0184   | 29.6572     | 32.5141     | 63.8254     |
| External surface area (m <sup>2</sup> /g) | 0.0068     | 28.9177   | 27.6757     | 30.7317     | 61.9258     |
| Micropore area (m <sup>2</sup> /g)        | 0.6869     | 4.1007    | 1.9815      | 1.7824      | 1.8996      |
| Micropore volume (cm <sup>3</sup> /g)     | 0.0004     | 0.0020    | 0.0009      | 0.0007      | 0.0005      |
| Pore volume (cm <sup>3</sup> /g)          | 0.0023     | 0.0902    | 0.1110      | 0.1138      | 0.1821      |
| Average particle diameter (nm)            | 13.6887    | 10.7782   | 14.9773     | 14.0113     | 11.3385     |

**Table S3.** Adsorption isothermal parameters of Pb, Cu, and Cd by C4R1, C1R1, and C1R4.

| Isotherm model | Absorbent | Heavy metal | Parameter | Temperature |        |        |
|----------------|-----------|-------------|-----------|-------------|--------|--------|
|                |           |             |           | 25°C        | 35°C   | 45°C   |
| Langmuir       | C4R1      | Pb          | $q_m$     | 126.58      | 133.33 | 135.14 |
|                |           |             | $K_L$     | 4.16        | 3.95   | 3.89   |
|                |           |             | $R^2$     | 0.9682      | 0.9643 | 0.9698 |
| Freundlich     | C4R1      | Pb          | $K_F$     | 43.40       | 59.16  | 66.09  |
|                |           |             | $1/n$     | 0.3316      | 0.2604 | 0.261  |
|                |           |             | $R^2$     | 0.9377      | 0.9473 | 0.9496 |
| Sips           | C4R1      | Pb          | $K_S$     | 0.9216      | 0.8601 | 0.8456 |
|                |           |             | $n_s$     | 0.0570      | 0.0636 | 0.0681 |
|                |           |             | $R^2$     | 0.4065      | 0.3212 | 0.2666 |
| Langmuir       | C4R1      | Cu          | $q_m$     | 111.11      | 114.94 | 119.05 |
|                |           |             | $K_L$     | 1.18        | 1.14   | 1.11   |
|                |           |             | $R^2$     | 0.9563      | 0.9601 | 0.9691 |
| Freundlich     | C4R1      | Cu          | $K_F$     | 26.79       | 27.61  | 28.64  |
|                |           |             | $1/n$     | 0.3445      | 0.3535 | 0.3647 |
|                |           |             | $R^2$     | 0.9285      | 0.9271 | 0.9267 |
| Sips           | C4R1      | Cu          | $K_S$     | 0.0237      | 0.0284 | 0.0430 |
|                |           |             | $n_s$     | 0.4380      | 0.4544 | 0.4805 |
|                |           |             | $R^2$     | 0.9501      | 0.9522 | 0.9589 |
| Langmuir       | C4R1      | Cd          | $q_m$     | 106.38      | 111.11 | 120.49 |
|                |           |             | $K_L$     | 1.25        | 1.18   | 1.09   |
|                |           |             | $R^2$     | 0.9562      | 0.9595 | 0.9639 |
| Freundlich     | C4R1      | Cd          | $K_F$     | 25.61       | 26.60  | 28.49  |
|                |           |             | $1/n$     | 0.3304      | 0.3424 | 0.3566 |
|                |           |             | $R^2$     | 0.9448      | 0.9518 | 0.9517 |
| Sips           | C4R1      | Cd          | $K_S$     | 0.0146      | 0.0162 | 0.0192 |
|                |           |             | $n_s$     | 0.4090      | 0.4089 | 0.3938 |
|                |           |             | $R^2$     | 0.9398      | 0.9444 | 0.9522 |
| Langmuir       | C1R1      | Pb          | $q_m$     | 135.14      | 140.21 | 144.52 |
|                |           |             | $K_L$     | 3.89        | 3.76   | 3.64   |
|                |           |             | $R^2$     | 0.9707      | 0.9481 | 0.9554 |
| Freundlich     | C1R1      | Pb          | $K_F$     | 62.39       | 38.36  | 40.69  |
|                |           |             | $1/n$     | 0.2673      | 0.4273 | 0.4348 |
|                |           |             | $R^2$     | 0.9322      | 0.9360 | 0.9489 |
| Sips           | C1R1      | Pb          | $K_S$     | 0.1299      | 0.2318 | 0.3615 |
|                |           |             | $n_s$     | 0.3824      | 0.5472 | 0.6224 |
|                |           |             | $R^2$     | 0.9731      | 0.9487 | 0.9495 |
| Langmuir       | C1R1      | Cu          | $q_m$     | 114.94      | 117.64 | 126.58 |
|                |           |             | $K_L$     | 1.14        | 1.12   | 1.04   |
|                |           |             | $R^2$     | 0.9657      | 0.9686 | 0.9682 |
| Freundlich     | C1R1      | Cu          | $K_F$     | 27.53       | 28.42  | 30.00  |
|                |           |             | $1/n$     | 0.3516      | 0.3609 | 0.3747 |

|            |      |    |       |        |        |        |
|------------|------|----|-------|--------|--------|--------|
| Sips       | C1R1 | Cu | $R^2$ | 0.9376 | 0.9330 | 0.9629 |
|            |      |    | $K_S$ | 0.0274 | 0.0337 | 0.0260 |
|            |      |    | $n_s$ | 0.4446 | 0.4651 | 0.4234 |
| Langmuir   | C1R1 | Cd | $R^2$ | 0.9522 | 0.9527 | 0.9689 |
|            |      |    | $q_m$ | 108.70 | 113.64 | 129.87 |
|            |      |    | $K_L$ | 1.23   | 1.16   | 1.02   |
| Freundlich | C1R1 | Cd | $R^2$ | 0.9558 | 0.9554 | 0.9455 |
|            |      |    | $K_F$ | 25.94  | 27.22  | 34.44  |
|            |      |    | $1/n$ | 0.3354 | 0.3529 | 0.3496 |
| Sips       | C1R1 | Cd | $R^2$ | 0.9566 | 0.9562 | 0.9243 |
|            |      |    | $K_S$ | 0.0127 | 0.0142 | 0.0526 |
|            |      |    | $n_s$ | 0.3856 | 0.4021 | 0.3885 |
| Langmuir   | C1R4 | Pb | $R^2$ | 0.9522 | 0.9538 | 0.9655 |
|            |      |    | $q_m$ | 142.85 | 149.25 | 155.67 |
|            |      |    | $K_L$ | 3.68   | 3.53   | 3.41   |
| Freundlich | C1R4 | Pb | $R^2$ | 0.9749 | 0.9742 | 0.9773 |
|            |      |    | $K_F$ | 65.40  | 68.83  | 74.09  |
|            |      |    | $1/n$ | 0.2734 | 0.2815 | 0.2871 |
| Sips       | C1R4 | Pb | $R^2$ | 0.9307 | 0.9282 | 0.9206 |
|            |      |    | $K_S$ | 0.1466 | 0.1545 | 0.2723 |
|            |      |    | $n_s$ | 0.3789 | 0.3829 | 0.3962 |
| Langmuir   | C1R4 | Cu | $R^2$ | 0.9702 | 0.9711 | 0.9803 |
|            |      |    | $q_m$ | 119.05 | 123.46 | 138.89 |
|            |      |    | $K_L$ | 1.11   | 1.07   | 0.94   |
| Freundlich | C1R4 | Cu | $R^2$ | 0.9681 | 0.9711 | 0.9753 |
|            |      |    | $K_F$ | 28.65  | 62.47  | 32.46  |
|            |      |    | $1/n$ | 0.3605 | 0.2634 | 0.382  |
| Sips       | C1R4 | Cu | $R^2$ | 0.9431 | 0.9415 | 0.9300 |
|            |      |    | $K_S$ | 0.0325 | 0.0398 | 0.7115 |
|            |      |    | $n_s$ | 0.4446 | 0.4583 | 0.4955 |
| Langmuir   | C1R4 | Cd | $R^2$ | 0.9698 | 0.9722 | 0.9743 |
|            |      |    | $q_m$ | 112.36 | 116.27 | 128.21 |
|            |      |    | $K_L$ | 1.17   | 1.13   | 1.03   |
| Freundlich | C1R4 | Cd | $R^2$ | 0.9603 | 0.9641 | 0.9685 |
|            |      |    | $K_F$ | 26.77  | 49.89  | 30.25  |
|            |      |    | $1/n$ | 0.3456 | 0.2706 | 0.3683 |
| Sips       | C1R4 | Cd | $R^2$ | 0.9492 | 0.9568 | 0.9609 |
|            |      |    | $K_S$ | 0.0150 | 0.0172 | 0.0331 |
|            |      |    | $n_s$ | 0.3981 | 0.3980 | 0.4206 |
|            |      |    | $R^2$ | 0.9544 | 0.9598 | 0.9676 |

Where  $q_m$  (mg/g) is the saturated adsorption capacity,  $K_L$  (L/mg) is the equilibrium constant of Langmuir,  $K_F$  (L/mg) is the equilibrium constant of Freundlich,  $1/n$  is a value about the priority of the adsorption process,  $K_S$  (L/mg) is the equilibrium constant of Sips,  $n_s$  is the heterogeneity of the adsorbent surface,  $R^2$  is correlation coefficient of the curve. The adsorbent dosage was 0.1 g, the initial heavy metal concentration was 100 mg/L, pH=6 and adsorption time was 90 min.



**Table S4.** Kinetic fitting parameters of C4R1, C1R1, and C1R4 in the single system.

| Kinetic model       | Adsorbent | Parameter | Pb     | Cu     | Cd     |
|---------------------|-----------|-----------|--------|--------|--------|
| Pseudo-first-order  | C4R1      | $q_e$     | 48.12  | 45.24  | 43.20  |
|                     |           | $K_1$     | 1.352  | 0.457  | 0.317  |
|                     |           | $R^2$     | 0.9296 | 0.8376 | 0.8446 |
| Pseudo-second-order | C4R1      | $q_e$     | 50.14  | 47.98  | 46.07  |
|                     |           | $K_2$     | 1.854  | 0.524  | 0.378  |
|                     |           | $R^2$     | 0.9844 | 0.9712 | 0.9670 |
| Elovich             | C4R1      | A         | 132761 | 121    | 66     |
|                     |           | B         | 0.3006 | 0.1531 | 0.1408 |
|                     |           | $R^2$     | 0.7506 | 0.9395 | 0.9217 |
| Pseudo-first-order  | C1R1      | $q_e$     | 48.25  | 46.42  | 46.06  |
|                     |           | $K_1$     | 1.476  | 0.523  | 0.397  |
|                     |           | $R^2$     | 0.9240 | 0.8306 | 0.8521 |
| Pseudo-second-order | C1R1      | $q_e$     | 50.20  | 49.05  | 48.21  |
|                     |           | $K_2$     | 1.862  | 0.563  | 0.422  |
|                     |           | $R^2$     | 0.9832 | 0.9667 | 0.9710 |
| Elovich             | C1R1      | A         | 37427  | 152    | 111    |
|                     |           | B         | 0.1292 | 0.0732 | 0.0736 |
|                     |           | $R^2$     | 0.7571 | 0.9745 | 0.9503 |
| Pseudo-first-order  | C1R4      | $q_e$     | 48.59  | 47.14  | 46.43  |
|                     |           | $K_1$     | 1.483  | 0.512  | 0.402  |
|                     |           | $R^2$     | 0.8860 | 0.8479 | 0.9245 |
| Pseudo-second-order | C1R4      | $q_e$     | 50.36  | 50.19  | 49.52  |
|                     |           | $K_2$     | 1.964  | 0.574  | 0.517  |
|                     |           | $R^2$     | 0.9822 | 0.9788 | 0.9886 |
| Elovich             | C1R4      | A         | 54627  | 171    | 85     |
|                     |           | B         | 0.1332 | 0.0726 | 0.0657 |
|                     |           | $R^2$     | 0.7842 | 0.9497 | 0.9569 |

Where  $q_e$  (mg/g) is the theoretical adsorption capacity at equilibrium,  $K_1$  and  $K_2$  are separately the rate constants for pseudo-first-order and pseudo-second-order kinetic models, A [mg/(g·min)] is the initial adsorption rate for Elovich kinetic model, B (g/mg) is the Elovich adsorption constant,  $R^2$  is correlation coefficient of the curve. The temperature was 25 °C, the adsorbent dosage was 0.1 g, pH=6 and the initial heavy metal concentration was 100 mg/L.

**Table S5.** Kinetic fitting parameters of C4R1, C1R1, and C1R4 in the ternary system.

| Kinetic model       | Adsorbent | Parameter | Pb     | Cu     | Cd     |
|---------------------|-----------|-----------|--------|--------|--------|
| Pseudo-first-order  | C4R1      | $q_e$     | 43.16  | 39.88  | 29.76  |
|                     |           | $K_1$     | 1.473  | 0.673  | 0.511  |
|                     |           | $R^2$     | 0.9131 | 0.9876 | 0.9735 |
| Pseudo-second-order | C4R1      | $q_e$     | 46.02  | 42.79  | 35.21  |
|                     |           | $K_2$     | 1.976  | 0.702  | 0.628  |
|                     |           | $R^2$     | 0.9480 | 0.9913 | 0.9918 |
| Elovich             | C4R1      | A         | 43.97  | 4.27   | 3.49   |
|                     |           | B         | 0.1427 | 0.0873 | 0.1214 |
|                     |           | $R^2$     | 0.9199 | 0.9707 | 0.9810 |
| Pseudo-first-order  | C1R1      | $q_e$     | 48.84  | 43.89  | 33.54  |
|                     |           | $K_1$     | 1.476  | 0.694  | 0.517  |
|                     |           | $R^2$     | 0.8900 | 0.9865 | 0.9674 |
| Pseudo-second-order | C1R1      | $q_e$     | 45.21  | 47.04  | 36.12  |
|                     |           | $K_2$     | 2.083  | 0.744  | 0.622  |
|                     |           | $R^2$     | 0.9427 | 0.9920 | 0.9895 |
| Elovich             | C1R1      | A         | 44.56  | 4.25   | 3.41   |
|                     |           | B         | 0.1372 | 0.0829 | 0.1112 |
|                     |           | $R^2$     | 0.9450 | 0.9762 | 0.9869 |
| Pseudo-first-order  | C1R4      | $q_e$     | 46.21  | 45.89  | 36.25  |
|                     |           | $K_1$     | 1.397  | 0.698  | 0.564  |
|                     |           | $R^2$     | 0.8794 | 0.9745 | 0.9761 |
| Pseudo-second-order | C1R4      | $q_e$     | 49.40  | 48.52  | 40.12  |
|                     |           | $K_2$     | 2.165  | 0.802  | 0.671  |
|                     |           | $R^2$     | 0.9333 | 0.9864 | 0.9952 |
| Elovich             | C1R4      | A         | 50.61  | 4.79   | 4.86   |
|                     |           | B         | 0.1365 | 0.083  | 0.111  |
|                     |           | $R^2$     | 0.9327 | 0.9765 | 0.9811 |

Where  $q_e$  (mg/g) is the theoretical adsorption capacity at equilibrium,  $K_1$  and  $K_2$  are separately the rate constants for pseudo-first-order and pseudo-second-order kinetic models, A [mg/(g·min)] is the initial adsorption rate for Elovich kinetic model, B (g/mg) is the Elovich adsorption constant,  $R^2$  is correlation coefficient of the curve. The temperature was 25 °C, the adsorbent dosage was 0.1 g/L, pH=5 and the initial heavy metal concentration was 100 mg/L.
